# Supplementary material
Source: publisher figshare collection journal article supplement (https://acs.figshare.com/ndownloader/files/11443997)
Supplement: Supplementary file 1 [file 11443997]

## Sheet: Sheet1
Peptide	IPI	UniProt	Full Gene Name	Gene	Group	iRT
QISQAYEVLSDAK	IPI00012535	P31689	DnaJ homolog subfamily A member 1	DNAJA1	HSP40	25.22
TIVITSHPGQIVK	IPI00012535	P31689	DnaJ homolog subfamily A member 1	DNAJA1	HSP40	3.99
EYHPDKNPNAGDK	IPI00032406	O60884	DnaJ homolog subfamily A member 2	DNAJA2	HSP40	-33.18
EHEVFQR	IPI00032406	O60884	DnaJ homolog subfamily A member 2	DNAJA2	HSP40	-22.8
LSELEDLLPSRPEVPNIIGETEEVELQEFDSTR	IPI00032406	O60884	DnaJ homolog subfamily A member 2	DNAJA2	HSP40	119.51
KYHPDTNKDDPK	IPI00179187	Q96EY1	Isoform 2 of DnaJ homolog subfamily A member 3, mitochondrial	DNAJA3	HSP40	-9.5
EIFITFR	IPI00179187	Q96EY1	Isoform 2 of DnaJ homolog subfamily A member 3, mitochondrial	DNAJA3	HSP40	-19.13
DGADIHSDLFISIAQALLGGTAR	IPI00179187	Q96EY1	Isoform 2 of DnaJ homolog subfamily A member 3, mitochondrial	DNAJA3	HSP40	98.76
REAGEDEEGFLSK	IPI00294610	Q96EY1	DnaJ (Hsp40) homolog, subfamily A, member 3	DNAJA3	HSP40	36.9613
EAGEDEEGFLSK	IPI00294610	Q96EY1	DnaJ (Hsp40) homolog, subfamily A, member 3	DNAJA3	HSP40	5.71
NVVHQLSVTLEDLYNGVTK	IPI00383360	Q8WW22	DnaJ (Hsp40) homolog, subfamily A, member 4, isoform CRA_a	DNAJA4	HSP40	102.52
IIEVHVEK	IPI00383360	Q8WW22	DnaJ (Hsp40) homolog, subfamily A, member 4, isoform CRA_a	DNAJA4	HSP40	6.49
ETQYYDILGVK	IPI00465105	Q8WW22	Isoform 2 of DnaJ homolog subfamily A member 4	DNAJA4	HSP40	49.61
LISQAYEVLSDPK	IPI00465105	Q8WW22	Isoform 2 of DnaJ homolog subfamily A member 4	DNAJA4	HSP40	30.154
LPQLEALLPPR	IPI00465105	Q8WW22	Isoform 2 of DnaJ homolog subfamily A member 4	DNAJA4	HSP40	65.5584
EFC[+57.0]PNEQNWR	IPI00465105	Q8WW22	Isoform 2 of DnaJ homolog subfamily A member 4	DNAJA4	HSP40	35.81
GASDEEIKR	IPI00015947	P25685	DnaJ homolog subfamily B member 1	DNAJB1	HSP40	-31.96
DKPHNIFK	IPI00015947	P25685	DnaJ homolog subfamily B member 1	DNAJB1	HSP40	-21.77
FQMTQEVVC[+57.0]DEC[+57.0]PNVK	IPI00008454	Q9UBS4	DnaJ homolog subfamily B member 11	DNAJB11	HSP40	21.11
GSLIITFDVDFPK	IPI00008454	Q9UBS4	DnaJ homolog subfamily B member 11	DNAJB11	HSP40	77.3971
GASDEDLKK	IPI00014400	Q9NXW2	dnaJ homolog subfamily B member 12	DNAJB12	HSP40	-34.3
NHAPGATEAFK	IPI00014400	Q9NXW2	dnaJ homolog subfamily B member 12	DNAJB12	HSP40	-21.12
MGTPSC[+57.0]SR	IPI00014400	Q9NXW2	dnaJ homolog subfamily B member 12	DNAJB12	HSP40	-30.37
LYPLPSAR	IPI00178504	Q8TBM8	Isoform 1 of DnaJ homolog subfamily B member 14	DNAJB14	HSP40	9.23804
DAGDEDLKK	IPI00178504	Q8TBM8	Isoform 1 of DnaJ homolog subfamily B member 14	DNAJB14	HSP40	-34.3
NHAPGATDAFK	IPI00178504	Q8TBM8	Isoform 1 of DnaJ homolog subfamily B member 14	DNAJB14	HSP40	-26.45
SASADDIKK	IPI00220102	P25686	Isoform 3 of DnaJ homolog subfamily B member 2	DNAJB2	HSP40	-34.41
AEAGSGGPGFTFTFR	IPI00220102	P25686	Isoform 3 of DnaJ homolog subfamily B member 2	DNAJB2	HSP40	53.3
DGSNIIYTAK	IPI00003848	Q9UDY4	DnaJ homolog subfamily B member 4	DNAJB4	HSP40	-3.51
EALC[+57.0]GC[+57.0]SINVPTLDGR	IPI00003848	Q9UDY4	DnaJ homolog subfamily B member 4	DNAJB4	HSP40	52.2241
FGFNGLSR	IPI00016855	O75953	DnaJ homolog subfamily B member 5	DNAJB5	HSP40	9.18
RAPEPLYPR	IPI00016855	O75953	DnaJ homolog subfamily B member 5	DNAJB5	HSP40	-10.56
HASPEDIK	IPI00024523	O75190	Isoform A of DnaJ homolog subfamily B member 6	DNAJB6	HSP40	-30.56
APGPWDPLASAAGLK	IPI00024523	O75190	Isoform A of DnaJ homolog subfamily B member 6	DNAJB6	HSP40	67.29
EIAEAYETLSDANR	IPI00017608	Q9UBS3	DnaJ homolog subfamily B member 9	DNAJB9	HSP40	97.91
NKDENAETQFR	IPI00074870	Q61712	DnaJ homolog subfamily C member 1	DNAJC1	HSP40	-22.9883
DSVTC[+57.0]SPGMVR	IPI00074870	Q61712	DnaJ homolog subfamily C member 1	DNAJC1	HSP40	-9.41
LLEATAKPEPEEK	IPI00074870	Q61712	DnaJ homolog subfamily C member 1	DNAJC1	HSP40	-29.78
LLVELVQK	IPI00074870	Q61712	DnaJ homolog subfamily C member 1	DNAJC1	HSP40	-3.67
GVNSYPSLFIFR	IPI00293260	Q8IXB1	Isoform 1 of DnaJ homolog subfamily C member 10	DNAJC10	HSP40	87.47
GGDC[+57.0]LTSQTR	IPI00293260	Q8IXB1	Isoform 1 of DnaJ homolog subfamily C member 10	DNAJC10	HSP40	-23.93
ILYDILAFAK	IPI00293260	Q8IXB1	Isoform 1 of DnaJ homolog subfamily C member 10	DNAJC10	HSP40	89.75
EASSEELK	IPI00333016	Q9NVH1	Isoform 3 of DnaJ homolog subfamily C member 11	DNAJC11	HSP40	-24.73
LC[+57.0]MLYHPDK	IPI00333016	Q9NVH1	Isoform 3 of DnaJ homolog subfamily C member 11	DNAJC11	HSP40	-28.3
NTVGYLQWR	IPI00333016	Q9NVH1	Isoform 3 of DnaJ homolog subfamily C member 11	DNAJC11	HSP40	-5.46
AGFFGTVVEYGAER	IPI00333016	Q9NVH1	Isoform 3 of DnaJ homolog subfamily C member 11	DNAJC11	HSP40	98.46
LILTEASK	IPI00333016	Q9NVH1	Isoform 3 of DnaJ homolog subfamily C member 11	DNAJC11	HSP40	-17.32
LFNLVHQAYEVLSDPQTR	IPI00027984	Q9NVH1	Putative uncharacterized protein	DNAJC11	HSP40	100.726
GLEMEGWEVVER	IPI00027984	Q9NVH1	Putative uncharacterized protein	DNAJC11	HSP40	-9.04
GIRPGLTTVLAR	IPI00027984	Q9NVH1	Putative uncharacterized protein	DNAJC11	HSP40	14.2979
ALEC[+57.0]HPDK	IPI00029149	Q9UKB3	DnaJ homolog subfamily C member 12	DNAJC12	HSP40	-39.5312
MENEEC[+57.0]NEQR	IPI00029149	Q9UKB3	DnaJ homolog subfamily C member 12	DNAJC12	HSP40	-34.6201
LHLFASEQR	IPI00307259	O75165	DnaJ homolog subfamily C member 13	DNAJC13	HSP40	3.13
LIFSLLR	IPI00307259	O75165	DnaJ homolog subfamily C member 13	DNAJC13	HSP40	3.09
DSAGTAPNGTR	IPI00158847	Q5XIX0	DnaJ homolog subfamily C member 14	DNAJC14	HSP40	-36.0719
SSDLDLFR	IPI00158847	Q5XIX0	DnaJ homolog subfamily C member 14	DNAJC14	HSP40	32.1333
QGNAPVASGR	IPI00158847	Q5XIX0	DnaJ homolog subfamily C member 14	DNAJC14	HSP40	-33.64
RPDADVDQQR	IPI00001649	Q78YY6	DnaJ homolog subfamily C member 15	DNAJC15	HSP40	-34.4349
ISTPSFSSYYK	IPI00001649	Q78YY6	DnaJ homolog subfamily C member 15	DNAJC15	HSP40	23.9184
EAGLILGVSPSAGK	IPI00001649	Q78YY6	DnaJ homolog subfamily C member 15	DNAJC15	HSP40	28.7477
VMILNHPDK	IPI00001649	Q78YY6	DnaJ homolog subfamily C member 15	DNAJC15	HSP40	-9.48434
DLLETTTK	IPI00001649	Q78YY6	DnaJ homolog subfamily C member 15	DNAJC15	HSP40	0.650346
TLEQEIER	IPI00018798	Q91WT4	DnaJ homolog subfamily C member 17	DNAJC17	HSP40	0.59
AAELAVQNEVGLVDNPLK	IPI00018798	Q91WT4	DnaJ homolog subfamily C member 17	DNAJC17	HSP40	98.28
HMEPQVK	IPI00304306	Q96DA6	Mitochondrial import inner membrane translocase subunit TIM14	DNAJC19	HSP40	-36.5399
QVFQSLPK	IPI00304306	Q96DA6	Mitochondrial import inner membrane translocase subunit TIM14	DNAJC19	HSP40	5.48
EAALILGVSPTANK	IPI00304306	Q96DA6	Mitochondrial import inner membrane translocase subunit TIM14	DNAJC19	HSP40	29.32
IMLLNHPDK	IPI00304306	Q96DA6	Mitochondrial import inner membrane translocase subunit TIM14	DNAJC19	HSP40	0.650346
DLLEGQAK	IPI00304306	Q96DA6	Mitochondrial import inner membrane translocase subunit TIM14	DNAJC19	HSP40	-8.47
MLLLPSAADGR	IPI00448317	Q99543	DNAJC2 19 kDa protein	DNAJC2	HSP40	22.3112
GTAITHALTSASTLC[+57.0]QVEPVGR	IPI00448317	Q99543	DNAJC2 19 kDa protein	DNAJC2	HSP40	47.5288
NQDHYAVLGLGHVR	IPI00448317	Q99543	DNAJC2 19 kDa protein	DNAJC2	HSP40	8.89
AAGEPIKEGDNDYFTC[+57.0]ITK	IPI00448317	Q99543	DNAJC2 19 kDa protein	DNAJC2	HSP40	21.7085
DNFFEVFTPVFER	IPI00455199	Q99543	Isoform 2 of DnaJ homolog subfamily C member 2	DNAJC2	HSP40	119.17
EHGVVPQADNATPSER	IPI00455199	Q99543	Isoform 2 of DnaJ homolog subfamily C member 2	DNAJC2	HSP40	-15.05
IAEAVPGR	IPI00455199	Q99543	Isoform 2 of DnaJ homolog subfamily C member 2	DNAJC2	HSP40	-17.1
TWNHFSDNEAER	IPI00830108	Q99543	Isoform 1 of DnaJ homolog subfamily C member 2	DNAJC2	HSP40	-29.6146
QIEEINEQIR	IPI00830108	Q99543	Isoform 1 of DnaJ homolog subfamily C member 2	DNAJC2	HSP40	3.45
DASEEELKK	IPI00142716	Q5F1R6	Isoform 1 of DnaJ homolog subfamily C member 21	DNAJC21	HSP40	-24.95
VDPEDTNLNQDSAK	IPI00142716	Q5F1R6	Isoform 1 of DnaJ homolog subfamily C member 21	DNAJC21	HSP40	-11.1467
YRPQPGDEGPGR	IPI00027909	Q9H1X3	Isoform 1 of DnaJ homolog subfamily C member 25	DNAJC25	HSP40	-25.24
TPQSAEEAFLLVATAYETLKDEETR	IPI00027909	Q9H1X3	Isoform 1 of DnaJ homolog subfamily C member 25	DNAJC25	HSP40	98.16
MDFTAAR	IPI00006713	Q13217	DnaJ homolog subfamily C member 3	DNAJC3	HSP40	-5.24
LDEAEDDFKK	IPI00006713	Q13217	DnaJ homolog subfamily C member 3	DNAJC3	HSP40	-14.77
DEKPVEAIR	IPI00006713	Q13217	DnaJ homolog subfamily C member 3	DNAJC3	HSP40	-17.94
GLLSDEDLR	IPI00157375	Q96LL9	DnaJ homolog subfamily C member 30	DNAJC30	HSP40	14.7667
TPAPDPGSPR	IPI00157375	Q96LL9	DnaJ homolog subfamily C member 30	DNAJC30	HSP40	-24.4438
NATSDDIKK	IPI00023780	Q9H3Z4	Isoform 2 of DnaJ homolog subfamily C member 5	DNAJC5	HSP40	-34.3
YHPDKNPDNPEAADK	IPI00023780	Q9H3Z4	Isoform 2 of DnaJ homolog subfamily C member 5	DNAJC5	HSP40	-28.22
EATDTPIVIQPASATETTQLTADSHPSYHTDGFN	IPI00402231	Q9H3Z4	Isoform 2 of DnaJ homolog subfamily C member 5	DNAJC5	HSP40	111.829
NMYNWLLQNPK	IPI00184119	O75061	Isoform 2 of Putative tyrosine-protein phosphatase auxilin	DNAJC6	HSP40	98.09
IYSTC[+57.0]TDFER	IPI00184119	O75061	Isoform 2 of Putative tyrosine-protein phosphatase auxilin	DNAJC6	HSP40	44.0495
MDSTNADALYVR	IPI00329629	Q99615	DnaJ homolog subfamily C member 7	DNAJC7	HSP40	7.82
AVQFFVQALR	IPI00329629	Q99615	DnaJ homolog subfamily C member 7	DNAJC7	HSP40	60.75
AFEAVDK	IPI00003438	O75937	DnaJ homolog subfamily C member 8	DNAJC8	HSP40	-18.32
LLLDQEQK	IPI00003438	O75937	DnaJ homolog subfamily C member 8	DNAJC8	HSP40	-16.07
ALDVIQAGK	IPI00003438	O75937	DnaJ homolog subfamily C member 8	DNAJC8	HSP40	-21.12
EYVEHTVK	IPI00003438	O75937	DnaJ homolog subfamily C member 8	DNAJC8	HSP40	-28.04
KELGLDEGVDSLK	IPI00014718	Q8WXX5	RcDNAJ9 (Fragment)	DNAJC9	HSP40	6.78
ELGLDEGVDSLK	IPI00014718	Q8WXX5	RcDNAJ9 (Fragment)	DNAJC9	HSP40	29.95
VSLQVHPDR	IPI00154975	Q8WXX5	DnaJ homolog subfamily C member 9	DNAJC9	HSP40	-12.71
GSEEELADIK	IPI00154975	Q8WXX5	DnaJ homolog subfamily C member 9	DNAJC9	HSP40	0.53
KPAAAAAPGTAEK	IPI00032140	P50454	Serpin H1	HSP47	Other	-33
HLAGLGLTEAIDK	IPI00032140	P50454	Serpin H1	HSP47	Other	24.38
DLYLASVFHATAFELDTDGNPFDQDIYGR	IPI00032140	P50454	Serpin H1	HSP47	Other	99.81
ELHINLIPNKQDR	IPI00382470	P07900	Isoform 2 of Heat shock protein HSP 90-alpha	HSP90AA1	HSP90	14.24
NPDDITNEEYGEFYK	IPI00382470	P07900	Isoform 2 of Heat shock protein HSP 90-alpha	HSP90AA1	HSP90	30.53
YYTSASGDEMVSLK	IPI00382470	P07900	Isoform 2 of Heat shock protein HSP 90-alpha	HSP90AA1	HSP90	16.8
HLEINPDHSIIETLR	IPI00382470	P07900	Isoform 2 of Heat shock protein HSP 90-alpha	HSP90AA1	HSP90	32.58
DLIMDNC[+57.0]EELIPEYLNFIR	IPI00555957	Q58FG1	Putative heat shock protein HSP 90-alpha A4	HSP90AA4P	HSP90	117.23
STYGWTANMER	IPI00555957	Q58FG1	Putative heat shock protein HSP 90-alpha A4	HSP90AA4P	HSP90	14.36
ADHGEPIGR	IPI00414676	P08238	Heat shock protein HSP 90-beta	HSP90AB1	HSP90	-31.12
YHTSQSGDEMTSLSEYVSR	IPI00414676	P08238	Heat shock protein HSP 90-beta	HSP90AB1	HSP90	28.5
HLEINPDHPIVETLR	IPI00414676	P08238	Heat shock protein HSP 90-beta	HSP90AB1	HSP90	21.36
DLVVLLFETALLSSGFSLEDPQTHSNR	IPI00414676	P08238	Heat shock protein HSP 90-beta	HSP90AB1	HSP90	128.29
MDSC[+57.0]DELIPEYLNFIR	IPI00515119	P08238	Heat shock protein HSP 90-beta	HSP90AB1	HSP90	119.74
MSLIINTFYSNK	IPI00555565	Q58FF6	Putative heat shock protein HSP 90-beta 4	HSP90AB4P	HSP90	65.12
GFEVIYMSEPIDEYC[+57.0]VQQLK	IPI00555565	Q58FF6	Putative heat shock protein HSP 90-beta 4	HSP90AB4P	HSP90	82.68
GVVDSDDLPLNVSR	IPI00027230	P14625	HSP90B1 Endoplasmin	HSP90B1	HSP90	31.5
FQSSHHPTDITSLDQYVER	IPI00027230	P14625	HSP90B1 Endoplasmin	HSP90B1	HSP90	24.07
EPEC[+57.0]IHVM[+16.0]R	IPI00011932	O43301	Heat shock 70 kDa protein 12A	HSPA12A	HSP70	-13.1624
TPTTILLTPER	IPI00011932	O43301	Heat shock 70 kDa protein 12A	HSPA12A	HSP70	24.41
GAVLFGLDPAVIK	IPI00011932	O43301	Heat shock 70 kDa protein 12A	HSPA12A	HSP70	66.124
DYYHDLDPEEAR	IPI00307820	Q96MM6	Heat shock 70 kDa protein 12B	HSPA12B	HSP70	12.2948
IHSATDLTLK	IPI00307820	Q96MM6	Heat shock 70 kDa protein 12B	HSPA12B	HSP70	-3.07017
LHQLLDLSGR	IPI00307820	Q96MM6	Heat shock 70 kDa protein 12B	HSPA12B	HSP70	17.5653
VVVPHDVGLTILK	IPI00307820	Q96MM6	Heat shock 70 kDa protein 12B	HSPA12B	HSP70	38.1978
GAVLFGQAPGVVR	IPI00307820	Q96MM6	Heat shock 70 kDa protein 12B	HSPA12B	HSP70	30.9725
LGGQDFNQR	IPI00299299	P48723	Heat shock 70 kDa protein 13	HSPA13	HSP70	-2.09
LLQYLYK	IPI00299299	P48723	Heat shock 70 kDa protein 13	HSPA13	HSP70	-20.8
EPHSSDTELPK	IPI00299299	P48723	Heat shock 70 kDa protein 13	HSPA13	HSP70	-23.3098
YEIDTGEETK	IPI00292499	Q0VDF9	Heat shock 70 kDa protein 14	HSPA14	HSP70	-9.63
VLSTNTDDNIGGAHFTETLAQYLASEFQR	IPI00292499	Q0VDF9	Heat shock 70 kDa protein 14	HSPA14	HSP70	112.78
LVNHFVEEFKR	IPI00304925	P0DMV8, P0DMV9	Heat shock 70 kDa protein 1	HSPA1A/B	HSP70	9.53
SAVEDEGLK	IPI00304925	P0DMV8, P0DMV9	Heat shock 70 kDa protein 1	HSPA1A/B	HSP70	-18.6
LLQDFFDGR	IPI00911039	P0DMV8, P0DMV9	highly similar to Heat shock 70 kDa protein 1	HSPA1A/B	HSP70	51.2
EIAEAYLGGK	IPI00007702	P54652	Heat shock-related 70 kDa protein 2	HSPA2	HSP70	7.07
DAGTITGLNVLR	IPI00007702	P54652	Heat shock-related 70 kDa protein 2	HSPA2	HSP70	41.3
C[+57.0]QEVINWLDR	IPI00007702	P54652	Heat shock-related 70 kDa protein 2	HSPA2	HSP70	48.6
KMDQPPQAK	IPI00002966	O88600	Heat shock 70 kDa protein 4	HSPA4	HSP70	-32.24
VEPPKEEQK	IPI00002966	O88600	Heat shock 70 kDa protein 4	HSPA4	HSP70	-32.24
FITPEDLSK	IPI00295485	P83581	heat shock 70kDa protein 4-like	HSPA4L	HSP100	-28.76
YDHLDPTEMEK	IPI00295485	P83581	heat shock 70kDa protein 4-like	HSPA4L	HSP100	-9.69
HWPFMVVNDAGR	IPI00003865	P11142	Isoform 1 of Heat shock cognate 71 kDa protein	HSPA8	HSP70	46.17
SFYPEEVSSMVLTK	IPI00003865	P11142	Isoform 1 of Heat shock cognate 71 kDa protein	HSPA8	HSP70	64.11
SQIHDIVLVGGSTR	IPI00003865	P11142	Isoform 1 of Heat shock cognate 71 kDa protein	HSPA8	HSP70	11.16
QTQTFTTYSDNQPGVLIQVYEGER	IPI00003865	P11142	Isoform 1 of Heat shock cognate 71 kDa protein	HSPA8	HSP70	67.29
KEEFEHQQK	IPI00880019	P11142	Heat shock cognate 71 kDa protein	HSPA8	HSP70	-26.44
RYDDPEVQK	IPI00007765	P38646	Stress-70 protein, mitochondrial	HSPA9	HSP70	-25.42
ETAENYLGHTAK	IPI00007765	P38646	Stress-70 protein, mitochondrial	HSPA9	HSP70	-10.19
AQFEGIVTDLIR	IPI00007765	P38646	Stress-70 protein, mitochondrial	HSPA9	HSP70	77.2
YAEEDRR	IPI00007765	P38646	Stress-70 protein, mitochondrial	HSPA9	HSP70	-34.11
ERVEAVNMAEGIIHDTETK	IPI00007765	P38646	Stress-70 protein, mitochondrial	HSPA9	HSP70	48.03
VPFSLLR	IPI00025512	P04792	Heat shock protein beta-1	HSPB1	sHSPs	40.56
LFDQAFGLPR	IPI00025512	P04792	Heat shock protein beta-1	HSPB1	sHSPs	55.31
VSLDVNHFAPDELTVK	IPI00025512	P04792	Heat shock protein beta-1	HSPB1	sHSPs	46.29
DGVVEITGK	IPI00025512	P04792	Heat shock protein beta-1	HSPB1	sHSPs	-4.4
LATQSNEITIPVTFESR	IPI00025512	P04792	Heat shock protein beta-1	HSPB1	sHSPs	53.46
DGYVEVSGK	IPI00007264	Q9UJY1	Heat shock protein beta-8	HSPB8	sHSPs	-29.53
QQEGGIVSK	IPI00007264	Q9UJY1	Heat shock protein beta-8	HSPB8	sHSPs	-27.13
YLEAGAAGLR	IPI00100748	Q9NZL4	highly similar to Hsp70-binding protein 1	HSPBP1	Other	1.2
TEHSPFHEHVLGALC[+57.0]SLVTDFPQGVR	IPI00100748	Q9NZL4	highly similar to Hsp70-binding protein 1	HSPBP1	Other	83.02
LLQTC[+57.0]FSSPADDSMDR	IPI00100748	Q9NZL4	highly similar to Hsp70-binding protein 1	HSPBP1	Other	24.07
LPLALPPASQGC[+57.0]SSGGGGGGGGGSSAGGSGNSRPPR	IPI00442503	Q9NZL4	Hsp70-binding protein 1	HSPBP1	Other	6.75027
SYGNSSDSR	IPI00428100	Q9Y6D0	Selenoprotein K	HSPC030	Other	-31.59
YDDGRGPPGNPPR	IPI00428100	Q9Y6D0	Selenoprotein K	HSPC030	Other	-23.2502
GPPGNPPR	IPI00428100	Q9Y6D0	Selenoprotein K	HSPC030	Other	-31.4
HPSTNSLLR	IPI00023064	Q9P032	NADH dehydrogenase [ubiquinone] 1 alpha subcomplex assembly factor 4	HSPC125	Other	-15.42
EQISLYPEVK	IPI00023064	Q9P032	NADH dehydrogenase [ubiquinone] 1 alpha subcomplex assembly factor 4	HSPC125	Other	25.43
VGEVIVTK	IPI00076042	P10809	Short heat shock protein 60 Hsp60s2	HSPD1	HSP60	-12.06
DDAMLLK	IPI00076042	P10809	Short heat shock protein 60 Hsp60s2	HSPD1	HSP60	4.57
VTDALNATR	IPI00076042	P10809	Short heat shock protein 60 Hsp60s2	HSPD1	HSP60	-16.82
C[+57.0]IPALDSLTPANEDQK	IPI00076042	P10809	Short heat shock protein 60 Hsp60s2	HSPD1	HSP60	36.48
C[+57.0]EFQDAYVLLSEK	IPI00784154	P10809	60 kDa heat shock protein, mitochondrial	HSPD1	HSP60	63.34
KPLVIIAEDVDGEALSTLVLNR	IPI00784154	P10809	60 kDa heat shock protein, mitochondrial	HSPD1	HSP60	98.34
DMAIATGGAVFGEEGLTLNLEDVQPHDLGK	IPI00784154	P10809	60 kDa heat shock protein, mitochondrial	HSPD1	HSP60	127.83
NAGVEGSLIVEK	IPI00784154	P10809	60 kDa heat shock protein, mitochondrial	HSPD1	HSP60	7.73
VLLPEYGGTK	IPI00220362	P61604	10 kDa heat shock protein, mitochondrial	HSPE1	Other	14.18
NQQITHANNTVSNFK	IPI00218993	Q92598	Isoform Beta of Heat shock protein 105 kDa	HSPH1	HSP100	-10.56
VEDVSAVEIVGGATR	IPI00218993	Q92598	Isoform Beta of Heat shock protein 105 kDa	HSPH1	HSP100	27.91
